# **Gonadotropes in medaka grow long extensions with varicosity-like swellings, projecting towards each other and blood vessels.**

**Heidi Kristine Grønlien<sup>1\*</sup>, Romain Fontaine<sup>2#</sup>, Kjetil Hodne<sup>2#</sup>, Isabelle Tysseng<sup>3</sup>, Eirill Ager-Wick<sup>2</sup>, Finn-Arne Weltzien<sup>2</sup> and Trude Marie Haug<sup>4</sup>**

<sup>1</sup> Faculty of Health and Welfare, Østfold University College, 1757 Halden, Norway

<sup>2</sup> Department of Basic Sciences and Aquatic Medicine, Faculty of Veterinary Medicine, Norwegian University of Life Sciences, 0454 Oslo, Norway

<sup>3</sup> Department of Biosciences, Faculty of Natural Sciences, University of Oslo, 0316 Oslo, Norway

<sup>4</sup> Department of Oral Biology, Faculty of Dentistry, University of Oslo, 0372 Oslo, Norway

<sup>#</sup>These two authors contributed equally

\*Corresponding author: [heidi.k.gronlien@hiof.no](mailto:heidi.k.gronlien@hiof.no)

Østfold University College, Faculty of Health and Welfare, 1757 Halden, Norway

---

**Abbreviations:** ACTH, Adrenocorticotrophic hormone (mammals); DiI, lipophilic carbocyanine dye; FSH/Fsh, Follicle-stimulating hormone protein (mammals/fish); GFP, green fluorescent protein; GnRH/Gnrh, Gonadotropin releasing hormone protein (mammals/fish); IQR, interquartile range; LH/Lh, Luteinizing hormone protein (mammals/fish); Lh $\beta$ /Lh $\beta$ , Luteinizing hormone  $\beta$  subunit protein (mammals/fish); Lhb/lhb, Luteinizing hormone  $\beta$  subunit gene (mammals/fish); Tamra, 5/6-carboxy-tetramethyl-rhodamine succinimidyl ester

## Abstract

Accumulating evidence in the scientific literature indicates that some pituitary cell types are organized in complex networks. Previous observations have indicated that this may also be the case in medaka (*Oryzias latipes*), where long cellular extensions with varicosity-like swellings are formed by luteinizing hormone (Lh)-producing gonadotropes expressing green fluorescent protein. In this study, immunofluorescence of intact pituitaries reveal that Lh beta polypeptides are mainly located in the varicosity-like swellings and at the extremity of the extensions. Some extensions approach nearby Lh-producing cells, and other extensions are in close contact with blood vessels. To investigate whether these extensions may contribute to network formation, we followed their development using confocal and fluorescent microscopy on primary cultures. During the first two days in culture, the extensions initiated the formation of homotypic cellular networks and clustering. The extensions were classified as either major or minor. Major extensions were several cell diameters long, dependent on microtubules, and displaying varicosity-like swellings at regular intervals. Minor extensions typically protruded from the major, were significantly shorter and thinner, and dependent on actin. The swellings were dependent on both microtubules and actin. Flash photolysis of caged  $\text{Ca}^{2+}$  showed that the signal was propagated along the major extensions, intensifying in each swelling, indicating a continuous structure. However, the  $\text{Ca}^{2+}$  signal did not transfer to the next cell in the network, but was transferred between cells merged at their somas. In summary, Lh-producing gonadotropes in medaka display a complex cellular structure of extensions, possibly linked to communication with blood vessels and/or other gonadotrope cells.

**Keywords:** Network,  $\text{Ca}^{2+}$  signal, clustering, pituitary, filopodia, lamellipodia, varicosities

## 1. Introduction

The anterior pituitary is a complex endocrine gland that secretes multiple hormones to control lactation, growth, reproduction, and homeostasis. Accumulating evidence indicates that in both mammals and teleost fish, some pituitary cell types are organized into complex three-dimensional homotypic and heterotypic networks (Bonfont et al., 2005; Budry et al., 2011; Edwards et al., 2017; Golan et al., 2016a; Golan et al., 2016b; Mollard et al., 2012). In teleost fish, the different endocrine cell types are clustered (Golan et al., 2014; Levavi-Sivan et al., 2010; Weltzien et al., 2004), whereas in mammalian pituitaries the different pituitary cell types are distributed in a more mosaic-like pattern (Musumeci et al., 2015).

The anterior pituitary is under control of releasing and inhibiting factors from the brain; in mammals via the portal blood vessel system, in teleosts by axons extending to the pituitary target cells. The neuropeptide gonadotropin-releasing hormone (GnRH) is released in response to certain internal and external cues, and, in turn, stimulates pituitary gonadotropes to express and secrete gonadotropins; follicle-stimulating hormone (FSH) and luteinizing hormone (LH). Downstream, the gonadotropins stimulate gametogenesis and steroidogenesis in the gonads (Weltzien et al., 2004). In mammals and birds, FSH and LH are synthesized and secreted from the same cell (Pope et al., 2006), whereas in most teleost fish, they are produced by distinct cells (Kanda et al., 2011; Weltzien et al., 2014). In teleosts, both gonadotropes are clustered in proximal *pars distalis* (Levavi-Sivan et al., 2010; Weltzien et al., 2004; Zohar et al., 2010). Despite the differences between mammalian and teleost pituitary architecture, teleost pituitary cells are important for comparative studies of neuroendocrine regulation and intracellular signaling pathways (Chang and Pemberton, 2018).

In transgenic medaka (*Oryzias latipes*) that express green fluorescent protein (Gfp) under the control of the endogenous *lhb* promoter (tg(*lhb*:hrGfpII); see (Fontaine et al., 2019; Hildahl et al., 2012), Lh-cells form long extensions in primary culture (Strandabo et al., 2013),

and these differ from those previously described in gonadotrope cells from teleosts (Golan et al., 2016b; Hodne et al., 2013) and mammals (Alim et al., 2012; Childs, 1985; Navratil et al., 2007). This observation prompted us to investigate these extensions in more detail.

Evidence is accumulating that a large variety of cells, not only neurons, form extensions that communicate with other cells by direct contact (Kornberg and Roy, 2014). The connection between two cells can be either an open-ended connection through membrane fusion or electrical coupling via gap junctions, or a close-ended connections in which signals or cargo will have to cross two plasma membranes (Eom et al., 2015; Galkina et al., 2013; Kornberg, 2017; Roy et al., 2011; Sherer, 2013). Also in the pituitary, several endocrine cell types including gonadotropes, have been shown to form various extensions (Fontaine et al. 2019 submitted). For teleosts, the extent and the putative roles of such extensions are barely described so far. A plethora of different names has been suggested for structures that may later be shown to be identical or similar. In this article, we have therefore chosen the neutral terms major and minor extensions.

Here we describe and define the nature of the extensions formed from Lh-producing gonadotropes in medaka, both in intact pituitaries and dissociated primary cell cultures. In intact pituitaries we show how the extensions seem to form networks and reach out to blood vessels. In cell cultures, we have investigated dynamic properties not feasible to assess in intact tissue, like extension growth and initiation of contact.

## **2. Materials and methods**

### **2.1 Experimental model**

Japanese medaka (*Oryzias latipes*) of the d-rR strain were kept in recirculating systems with water temperature between 25 and 28 °C, salinity (800 µS), and pH (7.6), and light-dark cycle

of L14:D10. Fish were fed three times daily on a combination of dry feed (Scientific Fish Food, Special Diets Service, Essex, UK) and newly hatched brine shrimp, *Artemia sp.* (Argent, Redmond, WA, USA). Tg(*lhb:hrGfpII*) medaka, in which expression of Gfp is controlled by the endogenous *lhb* promoter (Hildahl et al., 2012), were used in all experiments. Fish used in the experiments were one-year old and female, except for imaging of intact pituitaries where both sexes were studied. Handling and use of fish were in accordance with guidelines of the Animal Welfare Committee of the University of Oslo. A general permission to keep the animals in the facilities was given by the Norwegian animal research authority (S-2008/108215) and all animals were kept and handled in agreement with their requirements. A specific approval for this study was not needed, as the animals themselves were not experimentally treated (Norwegian legislation for use of animals in research, Chapter II, §6).

## 2.2 Preparation and confocal imaging of pituitary glands

Pituitaries were removed rapidly from the skulls of anesthetized, decapitated medaka and embedded in a drop of 2% low-melting point agarose (Sigma-Aldrich, St. Lois, MO, USA) in the grooves (5 mm in diameter) of cavity microscope slides. The agarose was dissolved in artificial extracellular solution (ECS) containing 134 mM NaCl, 2.9 mM KCl, 2.1 mM CaCl<sub>2</sub>, 1.2 mM MgCl<sub>2</sub>, 0.1% bovine serum albumin (BSA), 10 mM HEPES, and 1.8 mM glucose. The pH was adjusted to 7.75 with NaOH, and the osmolarity adjusted to 280 mOsm using mannitol. Once the agarose had solidified, ECS with a temperature of 26 °C was added on top to keep the agarose moist. A total of 21 pituitary glands (from 14 female and 7 male fish) were examined.

To visualize blood vessels, lipophilic carbocyanine dye (DiI) (Invitrogen, Carlsbad, CA, USA), diluted in 4% paraformaldehyde (PFA) in PBS, was introduced into anesthetized fish by cardiac perfusion, as described in detail previously (Fontaine and Weltzien, 2019). Brain and pituitary were subsequently dissected and fixed overnight at 4 °C in 4% PFA. Tissues were then

rinsed with PBS-Tween (PBST), embedded in 3 % agarose, and sectioned with a vibratome (Leica, Wetzlar, Germany). Sections were stained with 4'6-diamidino-2-phenylindole dihydrochloride (DAPI) (1/1000, Sigma-Aldrich) for 20 min and mounted using vectashield (Vector Laboratories, Peterborough, UK).

Whole pituitaries and pituitary sections were imaged using an Olympus FluoView1000 inverted IX81 confocal laser-scanning microscope (Olympus, Tokyo, Japan) with water immersion 4X, 20X, and 40X, or oil 60X (1.10 N.A. Plan APO) objectives as appropriate, or Zeiss LSM710 confocal microscope (Carl Zeiss AG, Oberkochen, Germany) with 63X objective (1.3 N.A. LCI Plan-Neofluar). Optical sections were made every 0.2-0.5  $\mu\text{m}$  along the z-axis and images were obtained through projections of the z-stack. For all pituitaries investigated, the resulting z-stack was studied to ensure that structures that resembled extensions in one section were not the edge of a neighboring cell. Such structures with no cell soma in the section directly above or below, was registered as true extensions.

### **2.3 Tamra dye tracking in pituitary slices**

Dye tracing using Tamra (NHS-rhodamine (5/6-carboxy-tetramethyl-rhodamine succinimidyl ester) (ThermoFisher Scientific, Waltham, MA, USA) mixed isomer was conducted using the whole cell patch-clamp technique on brain pituitary slices. Following removal of intact brain with pituitary, 150  $\mu\text{m}$  slices were cut using a vibratome (VT 1000, Leica). Fresh slices were transferred to a recording chamber with ECS. Patch electrodes (borosilicate glass with filament, resistance 5 M $\Omega$ ) were filled with intracellular solution (mM): 120 CH<sub>3</sub>SO<sub>3</sub>K, 20 KCl, 10 HEPES/NaOH, 20 sucrose (pH 7.2), 290 mOsm. Immediately before conducting the experiments, 10  $\mu\text{l}$  Tamra (1mg/ml) was added to 1 ml intracellular solution. Following gigaseal formation, gentle suction was applied to allow complete access of the dye to the whole cell.

The cells were visualized using an infrared Dodt Gradient Contrast (DGC) system coupled to an upright Olympus fluorescence microscope with 40X water-immersion objective (0.8 N.A. Slicescope, Scientifica, Uckfield, UK). For excitation of Tamra, a diode light source was used (pE-4000 coolLED, Andover, UK). Tamra was excited at 550 nm, and the emission was collected after passing a 630/75 bandpass filter (Chroma Technology Corp, Vermont, USA). The cells were imaged using a sCMOS camera (optiMOS, QImaging, Surrey, BC, Canada) and both the light source and camera were controlled by  $\mu$ Manger software, version 1.4 (Edelstein et al., 2014).

## **2.4 Primary pituitary cell cultures**

The cell cultures were made as previously described (Ager-Wick et al., 2018; Strandabo et al., 2013). In brief, the fish were anesthetized, then the pituitary was dissected out and enzymatically digested with trypsin (2 mg/mL, Sigma-Aldrich) for 30 min at 26 °C, followed by incubation with trypsin inhibitor (1 mg/mL, Sigma-Aldrich) and Dnase I Type IV (2  $\mu$ g/mL, Sigma-Aldrich) for 20 min at 26 °C with gentle shaking. Pituitaries were then mechanically dissociated using a glass pipette, centrifuged at 100 g and resuspended in growth medium (L-15, Life Technologies) added 10 mM NaHCO<sub>3</sub> (in order to stabilize pH at 7.75), 1.8 mM glucose, penicillin/streptomycin (5 000 U per 100 mL medium, Lonza, Verviers, Belgium) and adjusted to 280-290 mOsm with mannitol. Dissociated cells were plated on poly-L-lysine pre-coated dishes fitted with a central glass bottom (MatTek Corporation, Ashland, MA, USA). Each pituitary resulted in a total of 5 000-10 000 cells, and each dish contained about 50 000-100 000 cells, limited to the glass region of the dish. Each culture contained 40-50 pituitaries, divided into four dishes. The cells were incubated at 26 °C and 1 % CO<sub>2</sub>, and used in experiments for up to 5 days after seeding (Ager-Wick et al., 2018).

## 2.5 Fluorescence imaging of primary cell cultures

Culture dishes were imaged using Olympus BX61WI and Zeiss LSM710 confocal microscopes. To study the initial plasticity of Lh-cells and their extensions, time-lapse confocal imaging was conducted immediately after seeding. To determine the cytoskeleton architecture of extensions, cells were exposed to either an inhibitor of actin filaments, cytochalasin B (Sigma-Aldrich), or to a tubulin-polymerization inhibitor, nocodazole (Sigma-Aldrich). Two hours after plating, cytochalasin B or nocodazole [1:5000 dilution from a  $10^{-2}$  M stock in DMSO] was added, giving a final concentration of  $10^{-7}$  M. Control cells were incubated in medium without DMSO as a 1:1000 dilution of DMSO had no effect on extension growth (data not shown). The cells were incubated at RT with cytochalasin B and nocodazole for 2 h followed by live imaging for 4 h. To investigate the effect of GnRH on extension growth, GnRH1 (Bachem, Budendorf, Switzerland) was added to the growth medium one day after plating to give a final concentration of  $10^{-7}$  M. The cells were incubated with GnRH1 for 20 h prior to imaging.

## 2.6 Uncaging of $\text{Ca}^{2+}$ in primary cell cultures

Primary pituitary cells were incubated for 1 h at 27 °C with 0.01 % pluronic, 5  $\mu\text{M}$  o-Nitrophenyl EGTA, AM (NP-EGTA-AM,  $\text{Ca}^{2+}$  caging compound, Thermo Fisher Scientific) and 5  $\mu\text{M}$  Cal-590-AM ( $\text{Ca}^{2+}$ -sensitive dye, AAT Bioques, Sunnyvale, CA, USA) in ECS without BSA, followed by 20 min desensitization of NP-EGTA and Cal590 in ECS containing 0.1 % BSA. The cells were visualized as described for Tamra dye tracking. Gfp was excited at 470 nm, and emission was collected after passing a 525/50 bandpass filter (Chroma Systems Solutions). Cal590 was excited at 580 nm and images were collected after passing a 630/75m bandpass filter (ET630/75m emitter, Chroma System Solutions). For  $\text{Ca}^{2+}$  imaging, an exposure



time of between 50 and 80 ms was used and images were sampled at 0.5 Hz. To uncage NP-EGTA, pulses of 50-250 ms were delivered using a 405 nm laser pre-set at 7 mW (Laser Applied Stimulation and Uncaging system, Scientifica). The laser passed through an 80/20 beam splitter and was targeted to distinct regions of the cells using two galvanometer scan mirrors controlled by software (Scientifica) developed in LabVIEW (National instruments, Austin, TX, USA). Images containing laser reflection were removed from the final imaging profile post recording. The relative fluorescence intensity was calculated after background subtraction as changes in fluorescence ( $\Delta F$ ) divided by average intensity of the first 15 frames (F).

## **2.7 Immunofluorescence in primary cell cultures**

Two days after plating, the cells were fixed in 4 % PFA for 10 min at room RT, rinsed in PBST several times, and incubated in blocking buffer (10% normal goat serum (Sigma-Aldrich) in PBST) for 1 h. Cells were then incubated with antibody (from rabbit, produced in house) against medaka Lh-beta polypeptides (Lh $\beta$ ) overnight at 4 °C (Burow et al., 2018), washed in PBST three times, and incubated for 1 h with secondary antibody conjugated to Alexa-fluor 488 (1/1000, Invitrogen) at RT. Finally, the cell culture was washed again in PBST several times before imaging as described above.

## **2.8 Image analysis and processing**

Images were processed using the open-source software from ImageJ (versions 1.37v and 2.0.0, National Institute of Health, Bethesda, MD, USA) and Imaris 9.1 (Bitplane, Oxford Instruments Company, Abingdon, UK). Extension length was analyzed with plugin NeuronJ (Meijering et al., 2004). The lengths of major extensions were measured from soma to tip. For intercellular

bridges the length was determined as half the bridge length. For branched extensions the length of the secondary extension was measured from the intersection. The smallest diameter was used for analysis.

All photomontages were made in Adobe Photoshop, Illustrator, and Indesign CC2018 (Adobe systems Inc., San Jose, CA, USA).

## **2.9 Quantification and statistical analysis**

Numerical data are presented as percentage, mean  $\pm$  standard deviation (SD) or median and interquartile range (IQR). All data from intact pituitaries are from at least three individuals. All data from primary cell cultures are from at least three independent cultures. In all cases, data distribution was tested for normality. Independent sample t-tests were performed for comparisons of length, diameter and number of extensions, and Mann-Whitney U-tests were performed for comparison of time. The relationship between variables was investigated using Pearson product moment correlation coefficient ( $r$ ). Preliminary analyses were performed to ensure no violation of the assumptions.  $p$  values below 0.05 were defined as statistically significant. All analyses were performed using SPSS 23 for Windows (IBM, Armonk, NY, USA). Boxplots were generated by the application BoxPlotR (Spitzer et al., 2014).

## **3. Results**

### **3.1 Characteristics of Lh-cell extensions in intact pituitaries**

The endogenously produced Gfp in the transgenic *tg(lhb-hrGfpII)* medaka line provides a robust fluorescent signal from all parts of the cell, also during prolonged confocal imaging, and thus enabled extensive and detailed mapping of anatomical structures within the tissue. Confocal images from intact pituitaries revealed that Lh-cells form numerous long extensions

(Fig. 1A). Interestingly, the extensions displayed multiple distinct areas of enlargement, hereafter referred to as swellings (arrows). Similar structures were observed in pituitaries from both male (n=7) and female (n=14) fish. Furthermore, filling cells in pituitary slices with Tamra repeatedly displayed long cellular extensions with varicosity-like swellings (n=5, Fig. 1B). Tamra was never transferred to other cells in contact with the filled one.

Pituitary sections after cardiac perfusion with DiI, which labels the endothelium, showed that some Lh-cells are organized around blood vessels, with their extensions projecting towards the vessel (Figs. 1C and D). The terminal part of the extension appeared wider where it reached the blood vessel (Fig. 1C).

### **3.2 Characteristics of the Lh-cell extensions in primary cell cultures**

#### **3.2.1 Extensions can be divided in two categories: major and minor**

During dissociation, the cells lost all their extensions. However, after approximately 1 h (median 66 minutes, IQR 128 min; n=45 cells), the Lh-cells started forming new extensions. After 2 days, extensions with several swellings were observed from 99 % of the Lh-cells (Fig. 2). The overall number and length of the extensions plateaued after 2 days, therefore structural analyses were conducted at this time point. Extensions were also observed from about  $20 \pm 10$  % (n=3 cultures, in total 517 cells) of the non-*lhb*-expressing cells, but these were not investigated further.

The major extensions were heterogenic in appearance and size (Table 1, Figs. 2A and B). Figure 2C presents the distribution of length of 741 extensions from 311 Lh-cells. 90% of the extensions of Lh-cells displayed swellings; these were regularly spaced, with mean distance  $10.9 \pm 5.8 \mu\text{m}$  (n=60 cells/103 extensions). The cross-sectional area of a swelling constituted

$6.8 \pm 3.8$  % of the area of the soma (n=60 cells/103 extensions). For approximately 75% of the Lh-cells (n=232 cells), one or more of the major extensions branched.

Minor extensions were growing from all regions of the major extensions, including the tip and swellings (Fig. 2A). For each major extension,  $6.9 \pm 3.4$  (n=16 major extension) minor extensions were observed. These minor extensions were thinner, shorter and uniform in thickness without swellings (Table 1). The number of minor extensions correlated with the length of their major extension (Pearson's correlation coefficient (r) of 0.6, n=16,  $p=0.015$ ). Figure 2D shows the distribution of length of 114 minor extensions from 9 Lh-cells; none of the minor extensions exceeded 13  $\mu\text{m}$  in length.

### **3.2.2 $\text{Ca}^{2+}$ signals propagate from Lh-cell soma to the terminal**

To examine if the extensions are continuous structures where  $\text{Ca}^{2+}$  signals can propagate through the extensions,  $\text{Ca}^{2+}$  was uncaged in the soma of an Lh-cell. Monitoring the cytosolic  $\text{Ca}^{2+}$  concentration showed clearly that the  $\text{Ca}^{2+}$  signal propagated along the extension from the soma to the swellings, reaching the terminal of the cell (Fig. 3 and supplementary video S1).

### **3.2.3 Lh-cell extensions contain Lh $\beta$ protein**

Although the previous figures clearly show that the extensions and swellings are filled with GFP, this does not imply that the Lh hormone is located here, as the GFP protein is not linked to the Lh $\beta$  protein. To visualize the location and distribution of the hormone itself, immunofluorescent labeling of the Lh $\beta$  protein was performed. High fluorescence was detected in the major extensions, with the swellings and the extremities of the extensions more strongly labelled than the cell soma (Fig. 4), suggesting a high quantity of Lh $\beta$  protein in these cellular

regions. Although the immunofluorescent labelling is presented in green, it should thus not be confused with the endogenously produced GFP.

### **3.2.4 The cytoskeleton architecture of Lh-cell extensions**

Following incubation with the tubulin polymerization inhibitor, nocodazole, Lh-cells (n=21) produced only one type of extension (Fig. 5B). These were uniform in thickness, displayed no swellings, fewer than 10 % were branched, and they were thinner than the previously described major extensions, with a mean diameter of  $0.29 \pm 0.10 \mu\text{m}$  (n=130) (Fig. 5D). Thus, nocodazole-treated cells did not form typical major extensions. In contrast, Lh-cells (n=27) that had been incubated with cytochalasin B, an inhibitor of actin filaments, produced extensions with a mean diameter of  $0.84 \pm 0.10 \mu\text{m}$  (n=84) (Fig. 5D), which is similar to the previously described major extensions, but without the distinctive swellings (Fig. 5C). Of the cytochalasin B-treated cells, approximately 40 % displayed branching extensions, minor extensions were not observed, and only 5 out of 84 extensions were straight. In addition, the somas generally displayed an irregular shape (Fig. 5C).

### **3.2.5 Morphological effects in Lh-cells following Gnrh1 exposure**

To assess whether Gnrh may affect the appearance of extensions, we exposed of one day old primary cultures to  $10^{-7}$  M Gnrh1, the most commonly used concentration for hypothalamic releasing hormone studies. These cells were thus regularly exposed to Gnrh1 in vivo during their one-year old lifetime, then restricted from the hormone for one day before being reintroduced to Gnrh1 for 20 h. The exposure resulted in 85 % of the exposed cells (n=120) developing an irregularly shaped soma, with a significant higher number of minor extensions ( $27 \pm 13$  minor extensions per cell, n=17 cells) compared to unexposed cells ( $10 \pm 6$  minor

extensions per cell,  $n=16$  cells,  $p<0.001$ ) (Figure 6). In addition, a significant increase in the total number of major extensions from each cell was observed ( $p<0.001$ ); in the unexposed controls, the mean number of major extensions per Lh-cell was  $3.1 \pm 1.6$  ( $n=83$  cells), whereas  $5.8 \pm 3.1$  major extensions per Lh-cell were observed in *Gnrh1*-exposed cultures ( $n=80$  cells).

### 3.3 Contact between extensions from different Lh-cells in primary cell cultures

In the intact pituitary, most of the Lh-cells cluster in groups (Fig. 1A), and a similar clustering of Lh-cells was observed in cell cultures (Fig. 7A). To assess whether the extensions play a role in the clustering process, we followed the cells in time-lapse recordings directly after seeding (Fig 7B and supplementary video S2). Of 16 interactions between two Lh-cells, 7 contacts were made by an extension from one Lh-cell connecting with an extension from the other Lh-cell (Fig. 7B). The distance between the somas of the Lh-cells at the point of connection was  $27.2 \pm 9.8 \mu\text{m}$  ( $n=7$ ), and the median time from when the extensions were  $10 \mu\text{m}$  from each other until contact was established was 6.0 min (IQR = 3.0 min,  $n=7$ ). Contact could also be made directly between an extension and the soma of another Lh-cell (Fig. 7B). Of the 16 interactions analyzed, 9 such contacts were made. Here, the distance between the somas of the two Lh-cells was  $13.7 \pm 4.7 \mu\text{m}$  ( $n=9$ ). Thus, the distance was significantly shorter than when two extensions from different Lh-cells connected ( $p<0.001$ ). The median time from when the extension was  $10 \mu\text{m}$  from the other cell's soma to connection was made was 12.0 min (IQR=12.0,  $n=9$ ), which is significantly longer than when two extensions the same distance apart connect ( $p=0.04$ ).

Both ways of contact between two Lh-cells, either extension-extension or extension-soma, resulted in formation of a continuous structure without swellings that connected the two somas, hereafter referred to as an intercellular bridge. The bridges were dynamic in nature, following the cells' movements without breaking (Fig. 7B). The intercellular bridges typically straightened after contact, with median time between contact and straightening of the bridge

being 12.0 min (IQR=25.5 min, n=16). Bridge formation was followed by a period in which the Lh-cells moved closer together (Fig. 7B) with a mean shortening distance of  $10.4 \pm 3.1 \mu\text{m}$  (n=16). The shortening was no different regardless of whether the bridge had been made by two extensions connecting or by one extension connecting to the soma of another Lh-cell. The diameter of each bridge was  $1.05 \pm 0.27 \mu\text{m}$  (n=16), which is significantly thicker than the diameter of a major extension ( $p < 0.001$ ). During the first 10 h, most cell-cell connections that formed developed into bridges, followed by clustering soma to soma, and in our 2-day cultures, 40 % of the Lh-cells were clustered (n=623 Lh-cells). Although the Lh-cells tended to form homotypic networks in primary cell cultures, many extensions were not in contact with other cells (Fig. 8).

As shown earlier (Fig. 3) by monitoring the cytosolic  $\text{Ca}^{2+}$  concentration after uncaging  $\text{Ca}^{2+}$  in the soma of one cell, the  $\text{Ca}^{2+}$  signal propagated to the border between the extension and the cell to which it was connected. However, we did not observe any transfer of  $\text{Ca}^{2+}$  signal between the cells (n=20), neither via regular extensions nor via the straight intercellular bridges (n=13) (Fig. 9). Occasionally (n=3), we observed an elevation in intracellular  $\text{Ca}^{2+}$  concentration in extensions that we were unable to assign to neither the stimulated cell nor its neighbor (Fig. 9).

In contrast, when two or more cells were tightly merged soma to soma (Fig. 9 and supplementary video S3), in 71 % of all experiments (n=21), uncaging of  $\text{Ca}^{2+}$  in the soma of one cell induced a significant elevation of cytosolic  $\text{Ca}^{2+}$  in one or more of its merged neighbor cells. The elevation in the neighbor cell occurred within 500 ms after uncaging  $\text{Ca}^{2+}$ , and the peak response normally occurred 1-2 s after uncaging.

#### 4. Discussion

The established view regarding the morphology of endocrine cells from the anterior pituitary is that they have a uniform, rounded shape with few or no extensions of any type. This view has been repeatedly challenged in recent years, as more refined imaging methods have become available (Golan et al., 2016b; Le Tissier et al., 2016; Le Tissier et al., 2015; Mollard et al., 2012). Our transgenic medaka line, in which the Lh-producing cells are filled with Gfp, display a surprisingly complex pattern of extensions, apparently forming networks with each other. Although these extensions could be suspected to be an artifact associated with the primary culture protocol, our results show that similar structures are also clearly visible in intact pituitary. This spurs several intriguing lines for functional studies to explore the putative roles of pituitary endocrine cell extensions. Some putative roles are suggested in the following discussion, but need to be studied in greater detail.

Cellular extensions in non-neuronal cells have been subject of considerable attention lately (Antanaviciute et al., 2014; Eom et al., 2015; Kornberg and Roy, 2014; Navratil et al., 2007; Rustom et al., 2004). However, as early as 1985, it was noted that mammalian gonadotropes could be stimulated to form extensions by GnRH (Childs, 1985). These findings have been confirmed (Alim et al., 2012; Navratil et al., 2007), but the extensions appear to be structurally quite different from the extensions on medaka Lh-cells. To the best of our knowledge, structures similar to the extensions found on the medaka Lh-cells have not been reported elsewhere. The extensions appear remarkably similar to neurites, regarding diameter, length, dependency on microtubules and the fact that the extension is a continuous structure (Tennyson, 1970; van Beuningen and Hoogenraad, 2016). In addition, they both divide at distinct branching points, and display regularly spaced swellings (Malkinson and Spira, 2010; Tennyson, 1970). The structural similarity of the swellings to axonal varicosities, combined with the fact that they contain Lh, suggests that there may be exocytosis of Lh or other paracrine



signaling molecules from these swellings; this would be an interesting topic for future investigation.

The minor extensions of the Lh-cells are dependent on actin and are thus similar to the filopodia that originate from the growth cone of neurites (Gomez and Letourneau, 2014; Smith, 1988). The lack of distinct swellings on the nocodazole- and the cytochalasin B-treated cells suggests that both microtubules and actin filaments are involved in the structure of the swellings, as has been reported for axonal varicosities (Dent and Gertler, 2003). Intermediate filaments have been indicated to play a role in cytoskeletal rearrangements (Leduc and Etienne-Manneville, 2015), and a possible interplay between microfilaments, microtubules, and intermediate filaments in Lh-cell extensions would be worthy of further investigation.

The most striking differences between the processes observed on mammalian gonadotropes and medaka Lh-cells are that in the latter, the extensions are longer, branched, have varicosity-like swellings, and the cytoskeleton is not only actin-based. It is important to note, however, that because cellular extensions are extremely fragile, some of the observed structural differences may reflect artifacts associated with differences in experimental protocols.

There is evidence from mammalian studies that GnRH induces plasticity of gonadotropes and their extensions by remodeling of the actin cytoskeleton (Edwards et al., 2017; Navratil et al., 2007). We did not aim to extensively characterize such an effect on the Lh cells, but rather confirm that also in medaka, the gonadotrope extensions may be controlled by GnRH. The 20 h exposure to GnRH did seem to affect extension growth. In particular, GnRH seemed to alter the basis of the extensions, making it more similar to a lamellipodium. Lamellipodia are the dynamic domain for cell motility and require organization of actin filaments into lamella networks and bundle arrays (Abercrombie, 1980; Small et al., 2002). One may speculate that a GnRH-induced increase in connections between Lh-cells during sexual maturation may enhance

the efficiency of the coordinated Lh release necessary for reproduction. More elaborate studies are clearly needed to clarify the role of Gnrh in extension growth and Lh cell network formation.

The contact made by extensions during the initial hours after seeding often resulted in an intercellular bridge forming between two Lh-cells. The bridge was apparently strong enough to participate in drawing the two connected cells closer to each other. The ability of filopodia to pull and push have attracted considerable attention (Bornschlögl, 2013), and future research may reveal the cytoskeleton dynamics behind the bridge shortening. In contrast to mammalian gonadotropes that are scattered throughout large parts of the anterior pituitary, teleost gonadotropes are clustered (Levavi-Sivan et al., 2010; Musumeci et al., 2015; Weltzien et al., 2014). This means that there must be a targeted clustering of gonadotropes during development, even separating between Lh-expressing and Fsh-expressing cells, which might be controlled by Gnrh. Godoy and colleagues (Godoy et al., 2011) have suggested that the morphological plasticity of gonadotropes has a developmental role in the organization of the anterior pituitary, as Gnrh induces cell migration in addition to formation of extensions.

Corticotrope cells in the mammalian pituitary use their extensions (cytonemes) to form homotypic and heterotypic networks in addition to promoting long-distance secretion of ACTH (Budry et al., 2011). While in the present study, Lh-cells rarely connected to non-Lh-cells, mammalian gonadotropes form a network that closely follows the pre-established corticotrope network, and cells of these lineages maintain direct contact throughout adulthood (Budry et al., 2011). It is noteworthy that many of the contacts between gonadotropes and corticotropes in mammals involve extensions originating from the corticotropes (Budry et al., 2011; Fontaine et al., submitted; Mollard et al., 2012). A similar heterotypic network is not expected in teleosts, where the gonadotropes and corticotropes are clustered in separate areas. Thus, we would not expect a similar degree of contact between Lh cells and non-Lh cells (i.e. corticotropes) in medaka and other teleosts either.

$\text{Ca}^{2+}$  ions play an important role in cell signaling, i.e., for regulating hormone release (Stojilkovic, 2012). The transfer of  $\text{Ca}^{2+}$  signal from soma to the terminal of an extension, together with the significant concentration of hormone present in the swellings, opens up for the possibility that the extensions may have a role in secretion. In both mammals and teleosts there are indications that gonadotrope extensions may reach out to nearby blood vessels, resulting in more efficient release of hormone into the circulation (Alim et al., 2012; Childs, 1985; Childs et al., 1983; Golan et al., 2016b; Golan et al., 2015; Navratil et al., 2007). Our results indicate that this may also be the case in medaka. We show that the extensions of Lh-cells contain a high quantity of Lh $\beta$  protein and project into the perivascular space, offering the possibility of close contact between Lh-cells and the microcirculation.

We observed an extensive network of Lh-cells in both intact pituitary tissue and primary cell cultures, where the extensions seemed to be in physical contact.  $\text{Ca}^{2+}$  signals were not directly transferred from one cell to another through extensions, and further studies are necessary in order to determine whether the Lh-cells communicate via extensions in other ways, or whether the contacts are merely physical, closed-ended. Previous research has shown that gonadotropes may be functionally linked in larger networks by gap junctions, resulting in efficient spread of regulating signals (Golan et al., 2016b; Gongrich et al., 2016; Levavi-Sivan et al., 2005). The effective transfer of  $\text{Ca}^{2+}$  signals between merged cells shown in our study may be explained by the presence of gap junctions in the soma-soma connections, but not in the extensions. This also calls for more functional studies in the future.

## **Conclusion**

Lh-expressing gonadotropes from medaka display neurite-like extensions with varicosity-like swellings containing Lh, both in culture and intact pituitary. Some extensions contact

neighboring Lh-cells, apparently inducing clustering or forming Lh-cell networks. Other extensions project towards nearby capillaries.

## 5. References

- Abercrombie, M., 1980. The crawling movement of metazoan cells. *Proc. R. Soc. London. B Biol Sci* 207(1167), 129-147.
- Ager-Wick, E., Hodne, K., Fontaine, R., von Krogh, K., Haug, T.M., Weltzien, F.-A., 2018. Preparation of a high-quality primary cell culture from fish pituitaries. *JoVE (Journal of Visualized Experiments)*(138), e58159.
- Alim, Z., Hartshorn, C., Mai, O., Stitt, I., Clay, C., Tobet, S., Boehm, U., 2012. Gonadotrope plasticity at cellular and population levels. *Endocrinology* 153(10), 4729-4739.
- Antanaviciute, I., Rysevaite, K., Liutkevicius, V., Marandykina, A., Rimkute, L., Sveikatiene, R., Uloza, V., Skeberdis, V.A., 2014. Long-distance communication between laryngeal carcinoma cells. *PloS one* 9(6), e99196.
- Bonnefont, X., Lacampagne, A., Sanchez-Hormigo, A., Fino, E., Creff, A., Mathieu, M.N., Smallwood, S., Carmignac, D., Fontanaud, P., Travo, P., Alonso, G., Courtois-Coutry, N., Pincus, S.M., Robinson, I.C., Mollard, P., 2005. Revealing the large-scale network organization of growth hormone-secreting cells. *Proceedings of the National Academy of Sciences of the United States of America* 102(46), 16880-16885.
- Bornschlöggl, T., 2013. How filopodia pull: What we know about the mechanics and dynamics of filopodia. *Cytoskeleton* 70(10), 590-603.
- Budry, L., Lafont, C., El Yandouzi, T., Chauvet, N., Conejero, G., Drouin, J., Mollard, P., 2011. Related pituitary cell lineages develop into interdigitated 3D cell networks. *Proceedings of the National Academy of Sciences of the United States of America* 108(30), 12515-12520.
- Burow, S., Fontaine, R., von Krogh, K., Mayer, I., Nourizadeh-Lillabadi, R., Hollander-Cohen, L., Cohen, Y., Shpilman, M., Levavi-Sivan, B., Weltzien, F.-A., 2018. Medaka Follicle-stimulating hormone (Fsh) and Luteinizing hormone (Lh): Developmental profiles of pituitary protein and gene expression levels. *General and comparative endocrinology*.
- Chang, J.P., Pemberton, J.G., 2018. Comparative aspects of GnRH-Stimulated signal transduction in the vertebrate pituitary – Contributions from teleost model systems. *Molecular and cellular endocrinology* 463, 142-167.
- Childs, G.V., 1985. Shifts in gonadotropin storage in cultured gonadotropes following GnRH stimulation, *in vitro*. *Peptides* 6(1), 103-107.
- Childs, G.V., Naor, Z., Hazum, E., Tibolt, R., Westlund, K.N., Hancock, M.B., 1983. Cytochemical characterization of pituitary target cells for biotinylated gonadotropin releasing hormone. *Peptides* 4(4), 549-555.
- Dent, E.W., Gertler, F.B., 2003. Cytoskeletal dynamics and transport in growth cone motility and axon guidance. *Neuron* 40(2), 209-227.
- Edelstein, A.D., Tsuchida, M.A., Amodaj, N., Pinkard, H., Vale, R.D., Stuurman, N., 2014. Advanced methods of microscope control using  $\mu$ Manager software. *Journal of biological methods* 1(2), e10.

- Edwards, B.S., Clay, C.M., Ellsworth, B.S., Navratil, A.M., 2017. Functional Role of Gonadotrope Plasticity and Network Organization. *Frontiers in endocrinology* 8, 223.
- Eom, D.S., Bain, E.J., Patterson, L.B., Grout, M.E., Parichy, D.M., 2015. Long-distance communication by specialized cellular projections during pigment pattern development and evolution. *eLife* 4.
- Fontaine, R., Ager-Wick, E., Hodne, K., Weltzien, F.-A., 2019. Plasticity of Lh cells caused by cell proliferation and recruitment of existing cells. *Journal of Endocrinology* 240(2), 361-377.
- Fontaine, R., Ciani, E., Haug, T.M., Hodne, K., Ager-Wick, E., Baker, D.M., Weltzien, F.-A., submitted. Pituitary plasticity at cellular, population and structural levels: A comparison between fishes and mammals. *General and comparative endocrinology*.
- Fontaine, R., Weltzien, F.-A., 2019. Labelling of blood vessels in teleost brain and pituitary using cardiac perfusion with a DiI-fixative. (JoVe) *Journal of Visual Experiments*
- Galkina, S.I., Fedorova, N.V., Stadnichuk, V.I., Sud'ina, G.F., 2013. Membrane tubulovesicular extensions (cytonemes): secretory and adhesive cellular organelles. *Cell adhesion & migration* 7(2), 174-186.
- Godoy, J., Nishimura, M., Webster, N.J., 2011. Gonadotropin-releasing hormone induces miR-132 and miR-212 to regulate cellular morphology and migration in immortalized LbetaT2 pituitary gonadotrope cells. *Molecular endocrinology* 25(5), 810-820.
- Golan, M., Biran, J., Levavi-Sivan, B., 2014. A novel model for development, organization, and function of gonadotropes in fish pituitary. *Frontiers in endocrinology* 5, 182.
- Golan, M., Hollander-Cohen, L., Levavi-Sivan, B., 2016a. Stellate Cell Networks in the Teleost Pituitary. *Scientific reports* 6, 24426.
- Golan, M., Martin, A.O., Mollard, P., Levavi-Sivan, B., 2016b. Anatomical and functional gonadotrope networks in the teleost pituitary. *Scientific reports* 6, 23777.
- Golan, M., Zelinger, E., Zohar, Y., Levavi-Sivan, B., 2015. Architecture of GnRH-Gonadotrope-Vasculature Reveals a Dual Mode of Gonadotropin Regulation in Fish. *Endocrinology* 156(11), 4163-4173.
- Gomez, T.M., Letourneau, P.C., 2014. Actin dynamics in growth cone motility and navigation. *J Neurochem* 129(2), 221-234.
- Gongrich, C., Garcia-Gonzalez, D., Le Magueresse, C., Roth, L.C., Watanabe, Y., Burks, D.J., Grinevich, V., Monyer, H., 2016. Electrotonic Coupling in the Pituitary Supports the Hypothalamic-Pituitary-Gonadal Axis in a Sex Specific Manner. *Front Mol Neurosci* 9, 65.
- Hildahl, J., Sandvik, G.K., Lifjeld, R., Hodne, K., Nagahama, Y., Haug, T.M., Okubo, K., Weltzien, F.A., 2012. Developmental tracing of luteinizing hormone beta-subunit gene expression using green fluorescent protein transgenic medaka (*Oryzias latipes*) reveals a putative novel developmental function. *Dev Dyn* 241(11), 1665-1677.
- Hodne, K., Strandabo, R.A., von Krogh, K., Nourizadeh-Lillabadi, R., Sand, O., Weltzien, F.A., Haug, T.M., 2013. Electrophysiological differences between fshb- and lhb-expressing gonadotropes in primary culture. *Endocrinology* 154(9), 3319-3330.
- Kanda, S., Okubo, K., Oka, Y., 2011. Differential regulation of the luteinizing hormone genes in teleosts and tetrapods due to their distinct genomic environments – Insights into gonadotropin beta subunit evolution. *General and comparative endocrinology* 173(2), 253-258.
- Kornberg, T.B., 2017. Distributing signaling proteins in space and time: the province of cytonemes. *Curr Opin Genet Dev* 45, 22-27.
- Kornberg, T.B., Roy, S., 2014. Communicating by touch--neurons are not alone. *Trends in cell biology* 24(6), 370-376.
- Le Tissier, P., Campos, P., Lafont, C., Romano, N., Hodson, D.J., Mollard, P., 2016. An updated view of hypothalamic-vascular-pituitary unit function and plasticity. *Nat Rev Endocrinol*.

- Le Tissier, P.R., Hodson, D.J., Martin, A.O., Romano, N., Mollard, P., 2015. Plasticity of the prolactin (PRL) axis: mechanisms underlying regulation of output in female mice. *Advances in experimental medicine and biology* 846, 139-162.
- Leduc, C., Etienne-Manneville, S., 2015. Intermediate filaments in cell migration and invasion: the unusual suspects. *Current opinion in cell biology* 32, 102-112.
- Levavi-Sivan, B., Bloch, C.L., Gutnick, M.J., Fleidervish, I.A., 2005. Electrotonic coupling in the anterior pituitary of a teleost fish. *Endocrinology* 146(3), 1048-1052.
- Levavi-Sivan, B., Bogerd, J., Mananos, E.L., Gomez, A., Lareyre, J.J., 2010. Perspectives on fish gonadotropins and their receptors. *General and comparative endocrinology* 165(3), 412-437.
- Malkinson, G., Spira, M.E., 2010. Clustering of excess growth resources within leading growth cones underlies the recurrent "deposition" of varicosities along developing neurites. *Exp Neurol* 225(1), 140-153.
- Meijering, E., Jacob, M., Sarria, J.C., Steiner, P., Hirling, H., Unser, M., 2004. Design and validation of a tool for neurite tracing and analysis in fluorescence microscopy images. *Cytometry. Part A : the journal of the International Society for Analytical Cytology* 58(2), 167-176.
- Mollard, P., Hodson, D.J., Lafont, C., Rizzoti, K., Drouin, J., 2012. A tridimensional view of pituitary development and function. *Trends in endocrinology and metabolism: TEM* 23(6), 261-269.
- Musumeci, G., Castorina, S., Castrogiovanni, P., Loreto, C., Leonardi, R., Aiello, F.C., Magro, G., Imbesi, R., 2015. A journey through the pituitary gland: Development, structure and function, with emphasis on embryo-foetal and later development. *Acta Histochem* 117(4-5), 355-366.
- Navratil, A.M., Knoll, J.G., Whitesell, J.D., Tobet, S.A., Clay, C.M., 2007. Neuroendocrine plasticity in the anterior pituitary: gonadotropin-releasing hormone-mediated movement in vitro and in vivo. *Endocrinology* 148(4), 1736-1744.
- Pope, C., McNeilly, J.R., Coutts, S., Millar, M., Anderson, R.A., McNeilly, A.S., 2006. Gonadotrope and thyrotrope development in the human and mouse anterior pituitary gland. *Developmental biology* 297(1), 172-181.
- Roy, S., Hsiung, F., Kornberg, T.B., 2011. Specificity of *Drosophila* cytonemes for distinct signaling pathways. *Science* 332(6027), 354-358.
- Rustom, A., Saffrich, R., Markovic, I., Walther, P., Gerdes, H.H., 2004. Nanotubular highways for intercellular organelle transport. *Science* 303(5660), 1007-1010.
- Sherer, N.M., 2013. Long-distance relationships: do membrane nanotubes regulate cell-cell communication and disease progression? *Molecular biology of the cell* 24(8), 1095-1098.
- Small, J.V., Stradal, T., Vignal, E., Rottner, K., 2002. The lamellipodium: where motility begins. *Trends in cell biology* 12(3), 112-120.
- Smith, S.J., 1988. Neuronal cytomere mechanics: the actin-based motility of growth cones. *Science* 242(4879), 708-715.
- Spitzer, M., Wildenhain, J., Rappsilber, J., Tyers, M., 2014. BoxPlotR: a web tool for generation of box plots. *Nature methods* 11(2), 121.
- Stojilkovic, S.S., 2012. Molecular mechanisms of pituitary endocrine cell calcium handling. *Cell calcium* 51(3-4), 212-221.
- Strandabo, R.A., Hodne, K., Ager-Wick, E., Sand, O., Weltzien, F.A., Haug, T.M., 2013. Signal transduction involved in GnRH2-stimulation of identified LH-producing gonadotropes from lhb-GFP transgenic medaka (*Oryzias latipes*). *Molecular and cellular endocrinology* 372(1-2), 128-139.
- Tennyson, V.M., 1970. The fine structure of the axon and growth cone of the dorsal root neuroblast of the rabbit embryo. *The Journal of cell biology* 44(1), 62-79.

van Beuningen, S.F., Hoogenraad, C.C., 2016. Neuronal polarity: remodeling microtubule organization. *Current opinion in neurobiology* 39, 1-7.

Weltzien, F.A., Andersson, E., Andersen, O., Shalchian-Tabrizi, K., Norberg, B., 2004. The brain-pituitary-gonad axis in male teleosts, with special emphasis on flatfish (Pleuronectiformes). *Comp Biochem Physiol A Mol Integr Physiol* 137(3), 447-477.

Weltzien, F.A., Hildahl, J., Hodne, K., Okubo, K., Haug, T.M., 2014. Embryonic development of gonadotrope cells and gonadotropic hormones--lessons from model fish. *Molecular and cellular endocrinology* 385(1-2), 18-27.

Zohar, Y., Munoz-Cueto, J.A., Elizur, A., Kah, O., 2010. Neuroendocrinology of reproduction in teleost fish. *General and comparative endocrinology* 165(3), 438-455.

**Funding:** Supported by grants from the Norwegian Research Council: 184851 (FAW) and 191825 (TMH)

### **Declaration of interests**

The authors declare no competing interests.

### **Acknowledgements**

We thank the IBV Imaging Center, University of Oslo for help and expertise in confocal microscopy, and Professor Lucy Robertson for help during the writing process.

### **Author contributions**

Conceptualization, H.K.G. and T.M.H.; Investigation, H.K.G., R.F., K.H., I.T., E.AW, T.M.H.;

Writing, H.K.G., T.M.H., F.A.W., R.F., and K.H.; Project administration, H.K.G.; Funding acquisition, F.A.W. and T.M.H.

**Table 1.** Characteristics of major and minor extensions of Lh-cells in primary cell cultures at 48 h.

|                                         | <b>Major extension</b>           | <b>Minor extension</b>            |
|-----------------------------------------|----------------------------------|-----------------------------------|
| <i>Diameter (mean ± SD)</i>             | 0.87 ± 0.28 μm (n=158)           | 0.24 ± 0.05 (n=114)               |
| <i>Length (mean ± SD)</i>               | 25.1 ± 15.6 μm (n=741)           | 3.4 ± 2.3 (n=114)                 |
| <i>Appearance</i>                       | Irregular, bending               | Uniform, straight                 |
| <i>Cytoskeleton</i>                     | Microtubules and actin filaments | Actin filaments                   |
| <i>Number of extensions (mean ± SD)</i> | 2.5 ± 1.3 (n=311 cells)          | 6.9 ± 3.4 (n=16 major extensions) |
| <i>Swellings</i>                        | Yes                              | No                                |
| <i>Branching</i>                        | Yes                              | No                                |

## Figure legends

**Fig. 1.** Characteristics of Lh-cell extensions in whole pituitary.

(A) Projection of 10 μm confocal z-stack of Lh-cells in whole pituitary. Arrows show swellings. (B) Fluorescence image of a single Lh-cell in pituitary slice with Tamra dye (red) injected through a patch pipette. Arrows show swellings. (C) Projections of 10 μm confocal z-stack of Lh-cells in a fixed pituitary section with DiI cardiac perfusion in advance of dissection. Arrows show swellings nearby a blood vessel. (D) Projections of 10 μm confocal z-stack of Lh-cells in a fixed pituitary section with DiI cardiac perfusion in advance of dissection, with nuclear DAPI staining. Note that extensions from Lh-cells project towards the blood vessel. Scale bars represent 10 μm.



**Fig. 2.** Characteristics of Lh-cells with major and minor extensions in primary cell culture.

(A) Projection of a confocal plane of an Lh-cell from two days old dissociated primary pituitary cell culture. Arrows show swellings and arrowheads show minor extensions. (Bi-iv) Set of planar confocal projections of Lh-cells from primary cell cultures. Images present the heterogeneity of the Lh-cells. Scale bars represent 10  $\mu\text{m}$ . Violin plots of major extension length from 741 extensions (C) and minor extension length from 114 extensions (D). White circles show the medians; box limits indicate the 25th and 75th percentiles as determined by R software; whiskers extend 1.5 times the interquartile range from the 25th and 75th percentiles; polygons represent density estimates of data and extend to extreme values.

**Fig. 3.**  $\text{Ca}^{2+}$  signal propagation in an extension from an Lh-cell in primary cell culture.

Flash photolysis of caged  $\text{Ca}^{2+}$  in cultured Lh-cells recorded by  $\text{Ca}^{2+}$  imaging. Upper left panel shows two Lh-cells connected by an extension. The area of  $\text{Ca}^{2+}$  uncaging is marked with an arrow; colored boxes indicate the sites of intracellular  $\text{Ca}^{2+}$  measurement shown in the upper right panel. Changes in fluorescence ( $\Delta F$ ) divided by the average intensity of the first 15 frames (F) as a function of time. The pictures in the lower panels show imaging of intracellular  $\text{Ca}^{2+}$  concentration at the four time points indicated in the upper right graph. Note that the  $\text{Ca}^{2+}$  signal propagates along the extension, but does not transfer to the connected cell. See also video S1.

**Fig. 4.** Lh $\beta$  proteins in an Lh-cell in primary cell culture.

Planar confocal projection of an Lh $\beta$  immunoreactive cell. Arrows show the swellings and the extremities of the extensions with high content of Lh $\beta$  protein, and asterisk shows the cell body. Scale bar represents 10  $\mu$ m.

**Fig. 5.** Characteristics of Lh-cell extensions in culture treated with cytoskeleton inhibitors.

Planar confocal projections of (A) a non-treated Lh-cell (control), (B) an Lh-cell treated with  $10^{-7}$  M nocodazole, and of (C) an Lh-cell treated with  $10^{-7}$  M cytochalasin B, 6 h after seeding. Scale bars represent 10  $\mu$ m. (D-E) Boxplot of extension diameter and length 6 h after seeding. Center lines show the medians; box limits indicate the 25th and 75th percentiles as determined by R software; whiskers extend 1.5 times the interquartile range from the 25th and 75th percentiles, outliers are represented by dots; crosses represent sample means; bars indicate 95% confidence intervals of the means.  $n = 66, 69, 100, 84$  extensions. Nocodazole and cytochalasin B are inhibitors of microtubules and actin filaments, respectively.

**Fig. 6.** Characteristics of Lh-cell extensions in primary cell culture incubated with Gnrh1.

(A) Planar confocal projections of a Lh-cells incubated with  $10^{-7}$  M Gnrh1 for 20 hr. Note the irregularly shaped soma with a number of minor extensions of the Gnrh1 treated Lh-cells. Scale bars represent 10  $\mu$ m. (B-C) Boxplot of number of major and minor extensions per cell after incubation with  $10^{-7}$  M Gnrh1. Center lines show the medians; box limits indicate the 25th and 75th percentiles as determined by R software; whiskers extend 1.5 times the interquartile range from the 25th and 75th percentiles, outliers are represented by dots; crosses represent sample means; bars indicate 95% confidence intervals of the means.  $n = 83, 80$  cells and  $n = 16, 17$  cells for determining of number of major and minor extensions respectively.

**Fig. 7.** Development of extensions in primary cell culture.

(Ai) Planar confocal projections of Lh-cells immediately after seeding and (Aii) 17 h after seeding. Arrows show Lh-cells clustered in groups. (B) Time-lapse projections of four Lh-cells. Time zero is immediately after seeding. Arrowheads show extensions making intercellular contact followed by formation of an intercellular bridge. Asterisk marks a non-Lh-cell. See also video S2. Scale bars represent 10  $\mu\text{m}$ .

**Fig. 8.** Network of Lh-cells in primary cell culture.

Projection of a confocal plane of Lh-cells forming a network in three days old primary culture. Arrowhead shows an intercellular bridge between two Lh-cells. Scale bar represents 10  $\mu\text{m}$ .

**Fig. 9.**  $\text{Ca}^{2+}$  signaling between Lh-cells connected soma to soma in primary cell cultures

Flash photolysis of caged  $\text{Ca}^{2+}$  in cultured Lh-cells recorded by  $\text{Ca}^{2+}$  imaging. Upper left panel shows two Lh-cells connected by an intercellular bridge. The upper cell is merged to another Lh-cell, soma to soma. The area of  $\text{Ca}^{2+}$  uncaging is marked with an arrow; colored boxes indicate the sites of intracellular  $\text{Ca}^{2+}$  measurement shown in the upper right panel. Changes in fluorescence ( $\Delta F$ ) divided by the average intensity of the first 15 frames (F) as a function of time. The pictures in the lower panels show imaging of intracellular  $\text{Ca}^{2+}$  concentration at the four time points indicated in the upper right graph. Note that the  $\text{Ca}^{2+}$  signal transfers across the soma-soma border, but not across the intercellular bridge. See also video S3.

**Supplementary information**

**Video S1, related to Figure 3.**

Imaging of  $\text{Ca}^{2+}$  uncaging experiment showing propagation of  $\text{Ca}^{2+}$  signal through extension.

**Video S2, related to Figure 7B.**

Time-lapse video of primary culture during the first 17 hours after seeding. Frames are taken every 3 minutes. For scale bar and other details, see Figure 6.

**Video S3, related to Figure 9.**

Imaging of  $\text{Ca}^{2+}$  uncaging experiment showing propagation of  $\text{Ca}^{2+}$  signal across soma-soma border.

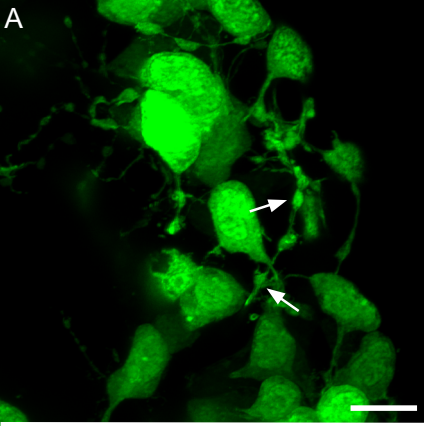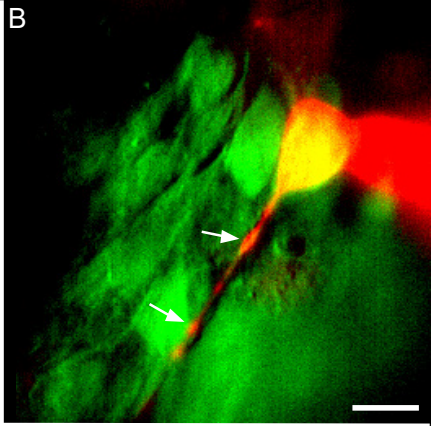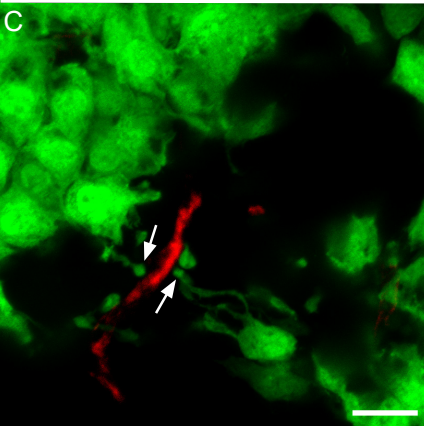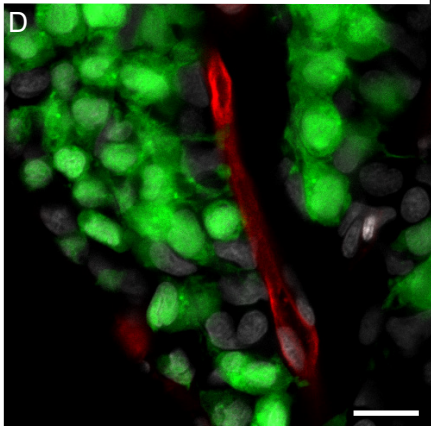

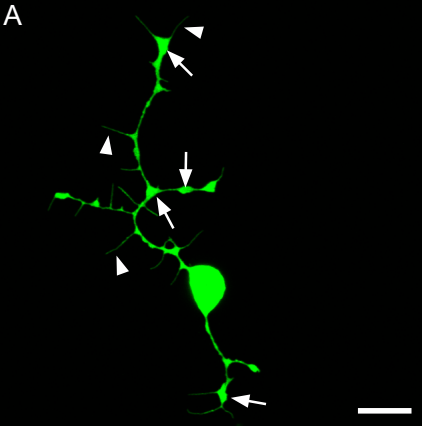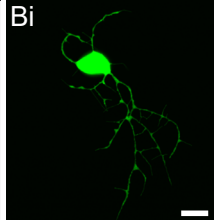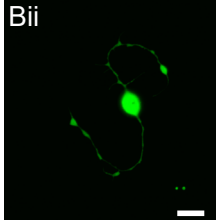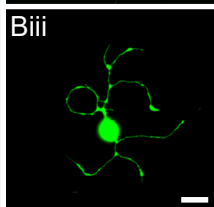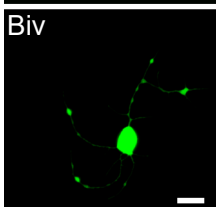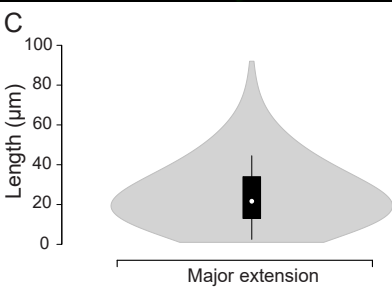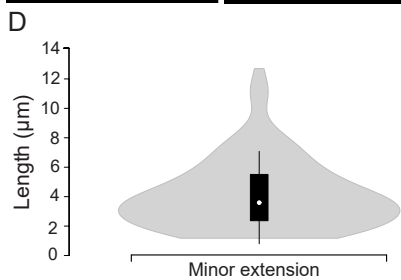

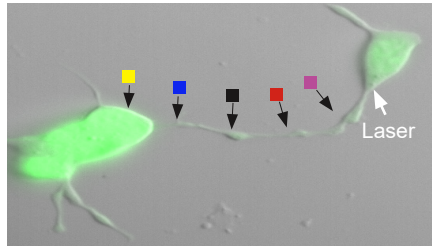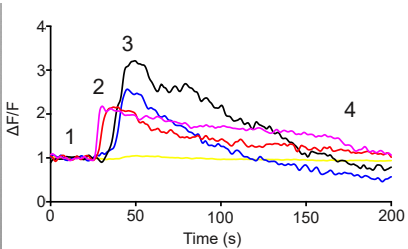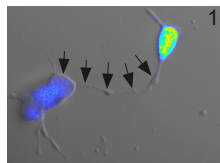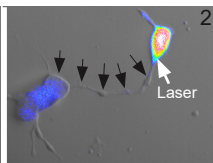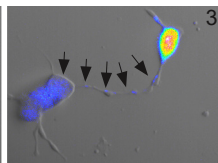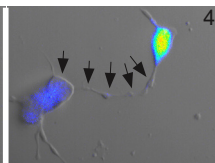

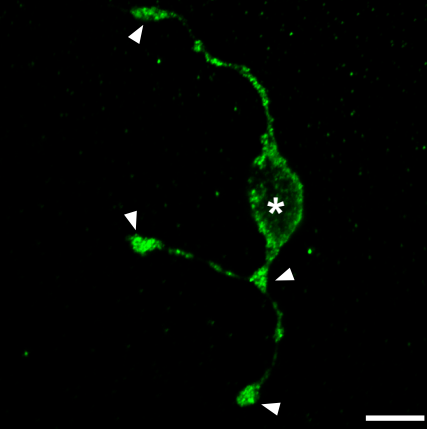



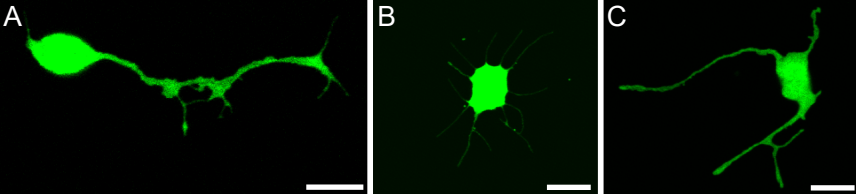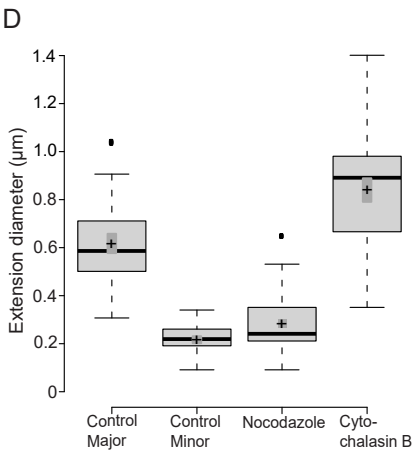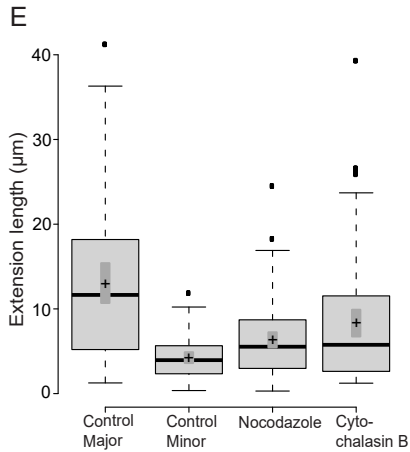

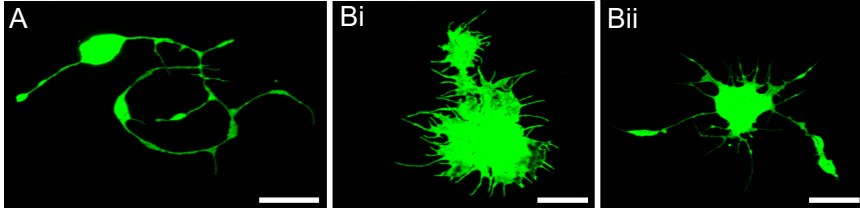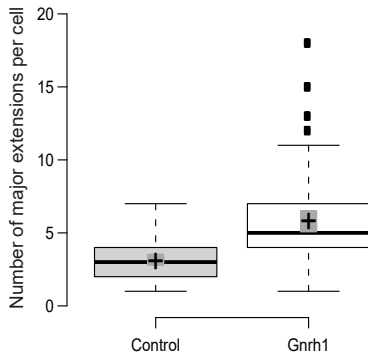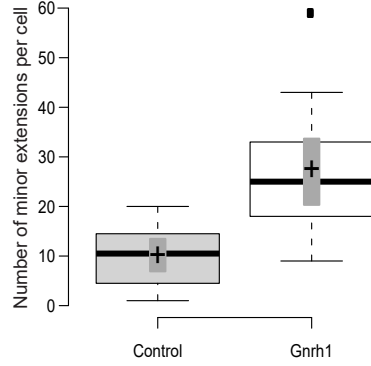

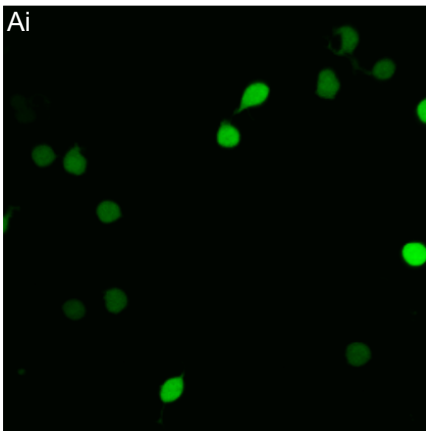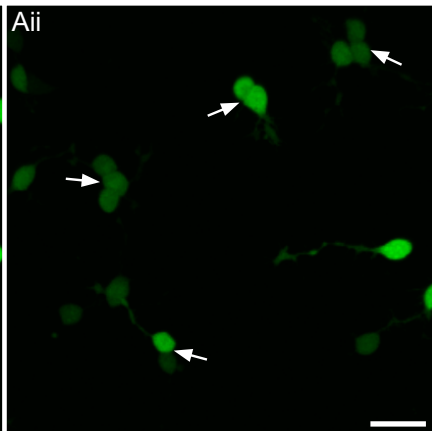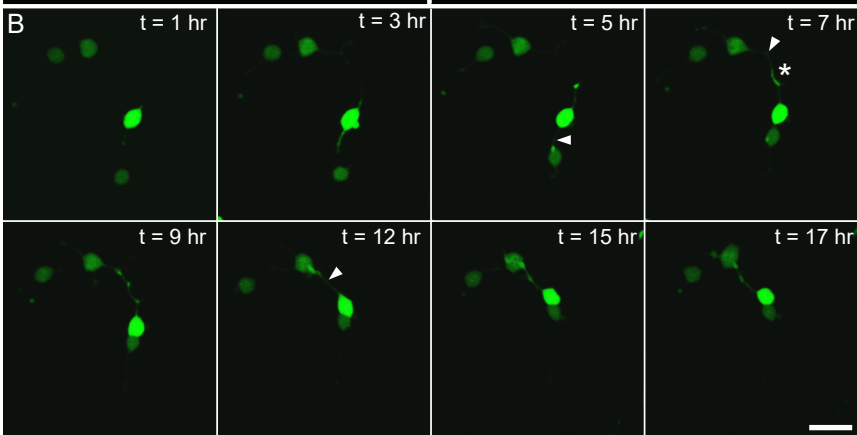

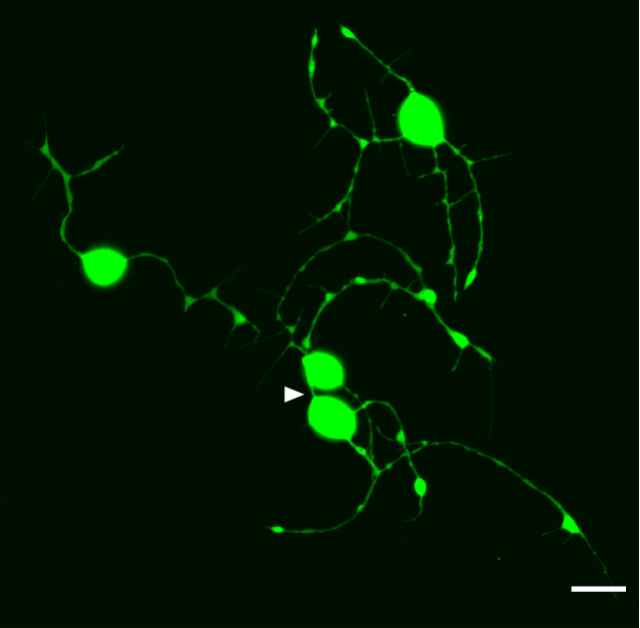

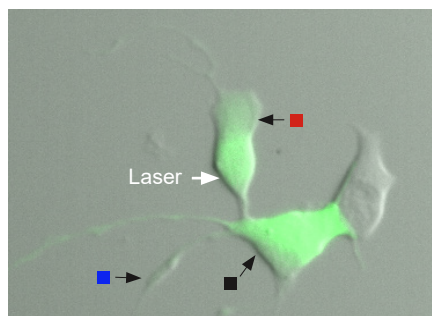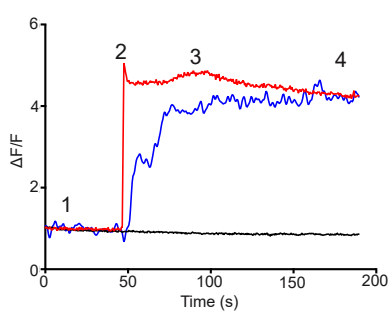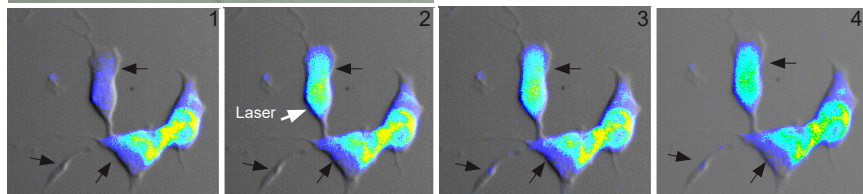

Source: http://biorxiv.org/content/10.1101/777151v1.full.pdf
